# Supplementary material for: Hollow manganese phosphate nanoparticles as smart multifunctional probes for cancer cell targeted magnetic resonance imaging and drug delivery
Source: Springer Nature journal article supplement (doi:10.1007/s12274-012-0252-z), 2012-09-07
Supplement: MOESM1 [file 12274_2012_252_MOESM1_ESM.pdf]

## Electronic Supplementary Material

# Hollow Manganese Phosphate Nanoparticles as Smart Multifunctional Probes for Cancer Cell Targeted Magnetic Resonance Imaging and Drug Delivery

Jing Yu<sup>1</sup>, Rui Hao<sup>1</sup>, Fugeng Sheng<sup>2</sup> (✉), Lili Xu<sup>2</sup>, Gongjie Li<sup>2</sup>, and Yanglong Hou<sup>1</sup> (✉)

<sup>1</sup> Department of Materials Science and Engineering, College of Engineering, Peking University, Beijing 100871, China

<sup>2</sup> Department of Radiology, Affiliated Hospital of the Academy of Military Medical Sciences, Beijing 100071, China

Supporting information to DOI 10.1007/s12274-012-0252-z

Figure S-2 shows the FTIR spectra of APS-PEG-COOH and APS-PEG-FA. As shown in Fig. S-2(a), the emergence of peaks at  $1026\text{ cm}^{-1}$  and  $879\text{ cm}^{-1}$  corresponding to Si-O-C stretching bands confirms the presence of APS in APS-PEG-COOH. The peaks at  $1105\text{ cm}^{-1}$  and  $1341\text{ cm}^{-1}$  most probably arise from C-O-C stretching and anti-symmetric stretching vibrations from the PEG [1]. Bands at  $2930\text{ cm}^{-1}$ ,  $2881\text{ cm}^{-1}$ , and  $1460\text{ cm}^{-1}$  arise from the anti-symmetric, symmetric stretching, and bending bands of  $-\text{CH}_2-$ . A broad  $-\text{OH}$  stretching band centered at  $3367\text{ cm}^{-1}$  arising from the PEG diacid is also present. The peak at  $1778\text{ cm}^{-1}$  is characteristic of the carbonyl stretching band of PEG diacid. These peaks show the successful chemical bonding of PEG diacid to APS. After binding FA with APS-PEG-COOH (Fig. S-2(b)) a peak at  $789\text{ cm}^{-1}$ , which can be attributed to N-H out of plane wagging of FA, was observed. Meanwhile, the N-H bending band from  $-\text{CONH}-$  at  $1608\text{ cm}^{-1}$  and the C-H aromatic stretching band at  $3050\text{ cm}^{-1}$  increased in absorbance, further confirming the formation of APS-PEG-FA [2].

TG/DTG plots of APS-PEG-COOH and APS-PEG-FA were obtained when using the optimum conditions, with a heating rate of  $10\text{ }^{\circ}\text{C}\cdot\text{min}^{-1}$  at a flow rate of  $60\text{ mL}\cdot\text{min}^{-1}$  of dry nitrogen gas. Figure S-3(a) shows the TG/DTG trace for APS-PEG-COOH. A mass loss occurred around  $100\text{ }^{\circ}\text{C}$  due to the loss of adsorbed water [3]. The peaks at  $420\text{ }^{\circ}\text{C}$  can be attributed to the decomposition of the intercalated APS while the peak at  $533\text{ }^{\circ}\text{C}$  corresponds to the decomposition of the grafted APS [4, 5]. The peak at  $389\text{ }^{\circ}\text{C}$  can be attributed to the decomposition of PEG diacid. These data confirm the linkage between APS and PEG diacid. Figure S-3(b) shows the TG/DTG image of APS-PEG-FA. Comparison with Fig. S-3(a) shows there are additional peaks at  $351\text{ }^{\circ}\text{C}$ ,  $465\text{ }^{\circ}\text{C}$ , and  $571\text{ }^{\circ}\text{C}$ , which can be attributed to the decomposition of FA [6], confirming the successful synthesis of APS-PEG-FA.

Address correspondence to Yanglong Hou, hou@pku.edu.cn; Fugeng Sheng, shengfugeng@gmail.com

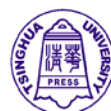

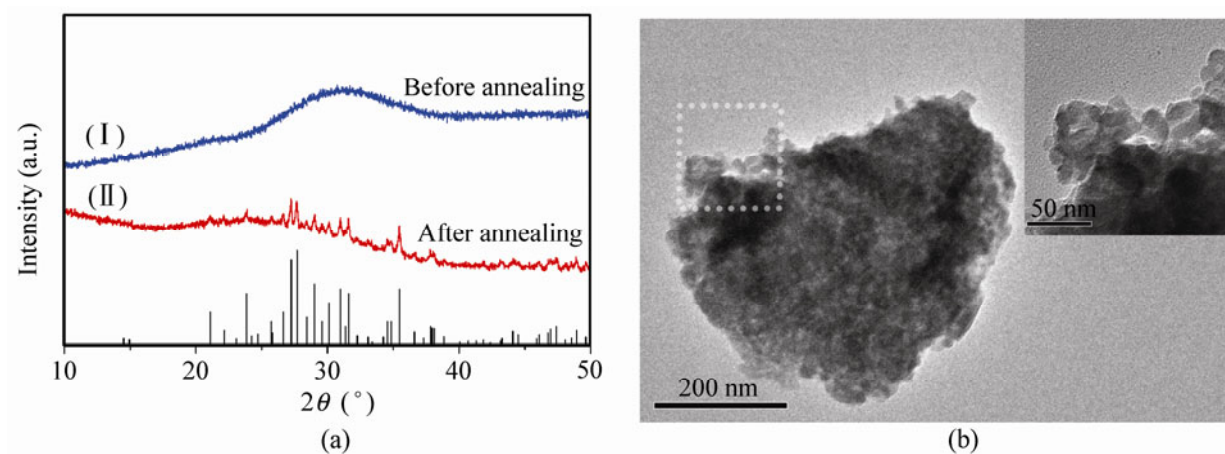

**Figure S-1** (a) XRD patterns of HMP NPs (I) before and (II) after annealing at 500 °C for 2 h. (b) TEM image of HMP NPs after annealing at 500 °C for 2 h

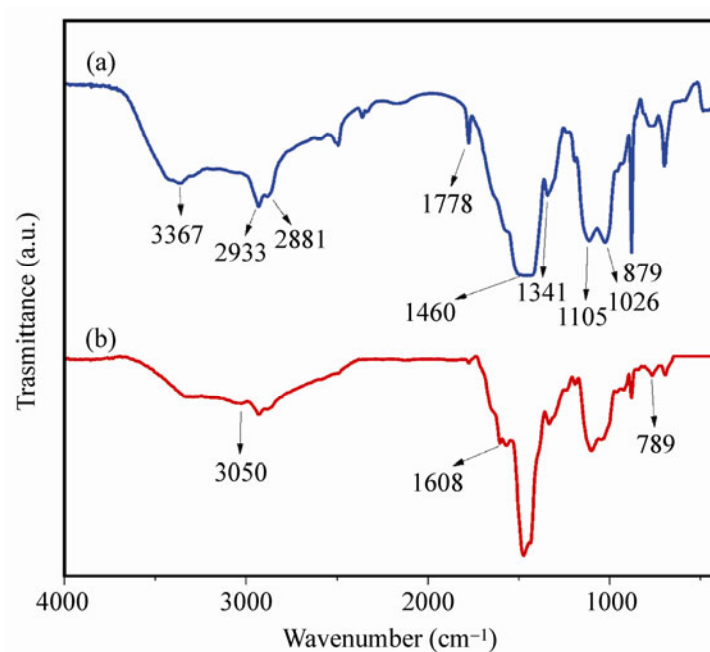

**Figure S-2** FTIR spectra of (a) APS-PEG-COOH and (b) APS-PEG-FA

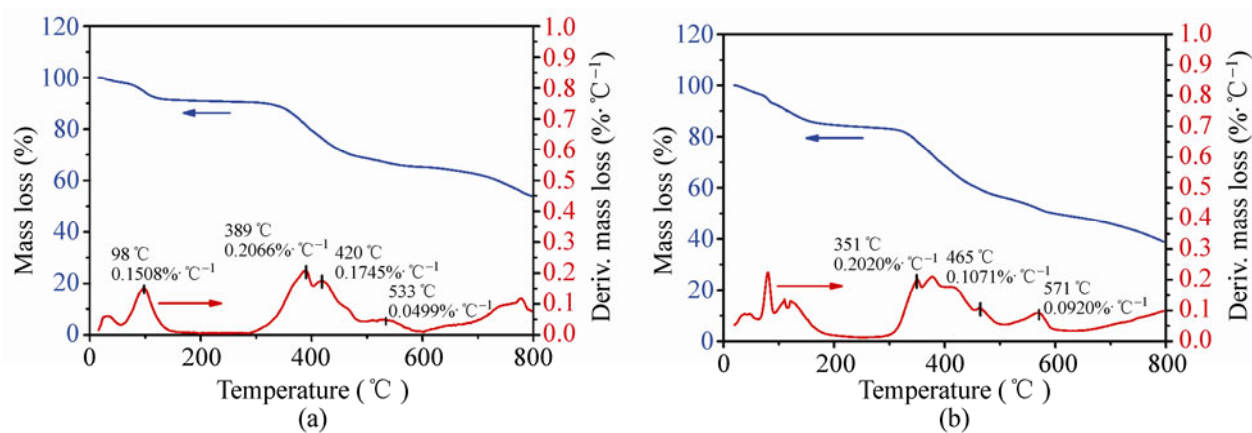

**Figure S-3** TG/DTG traces of (a) APS-PEG-COOH and (b) APS-PEG-FA

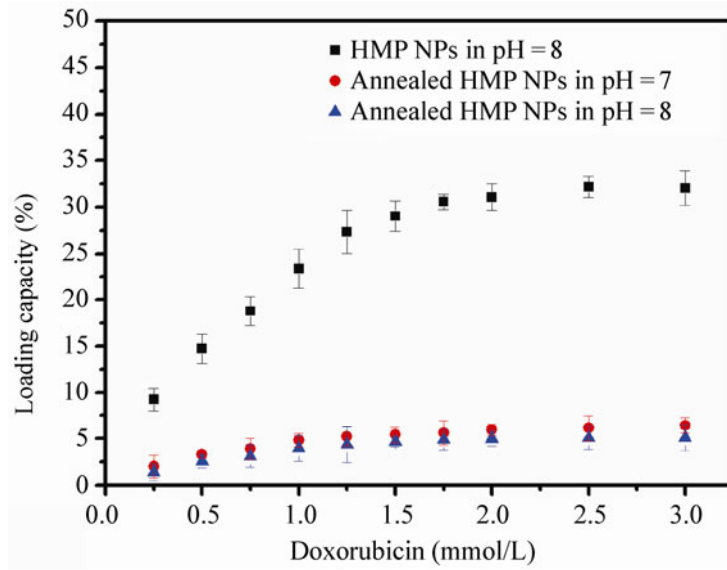

**Figure S-4** Quantification of DOX loading capacity of HMP NPs before annealing at different DOX concentrations at pH 7 and HMP NPs before annealing at different DOX concentrations at pH 8. Error bars are based on standard deviations of triplicated samples

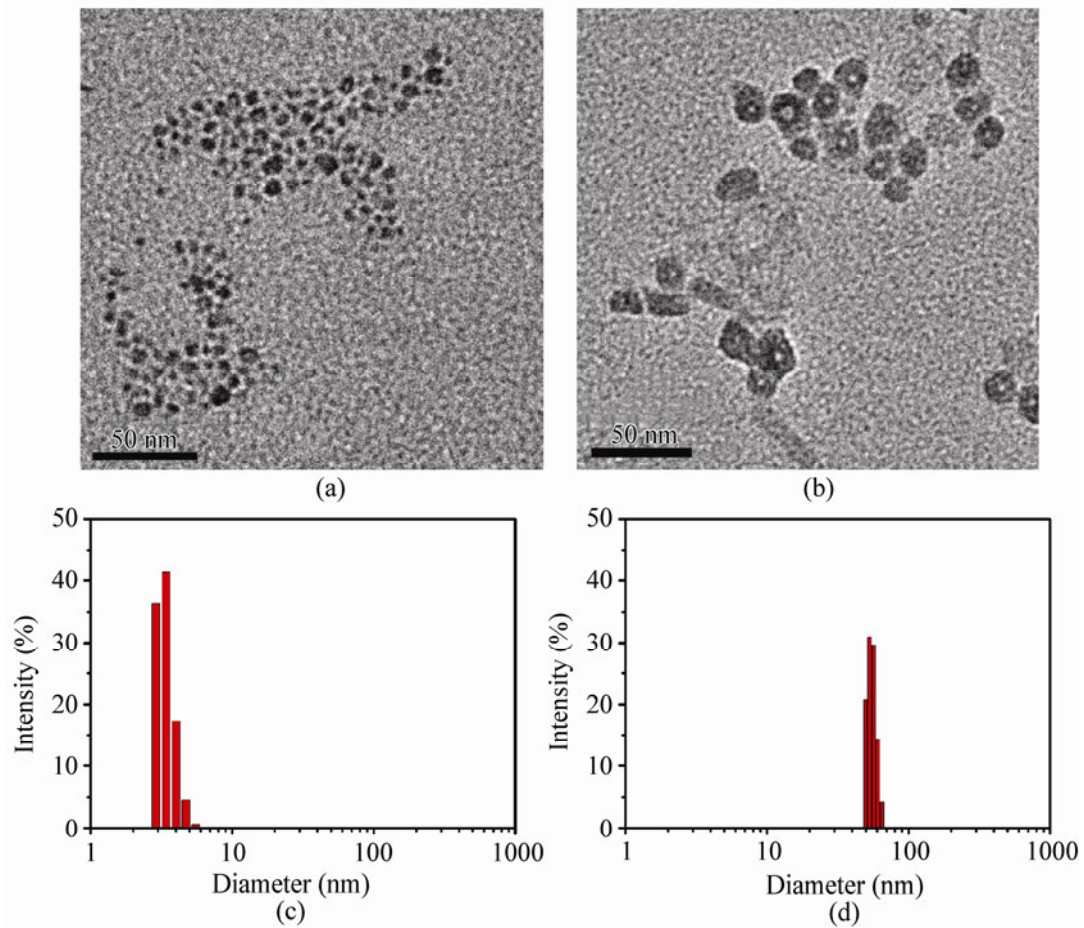

**Figure S-5** TEM images of HMP NPs dispersed in (a) pH 5.4 and (b) pH 7.4 buffer solutions. Hydrodynamic size distribution of HMP NPs dispersed in (c) pH 5.4 and (d) pH 7.4 buffer solutions monitored by DLS

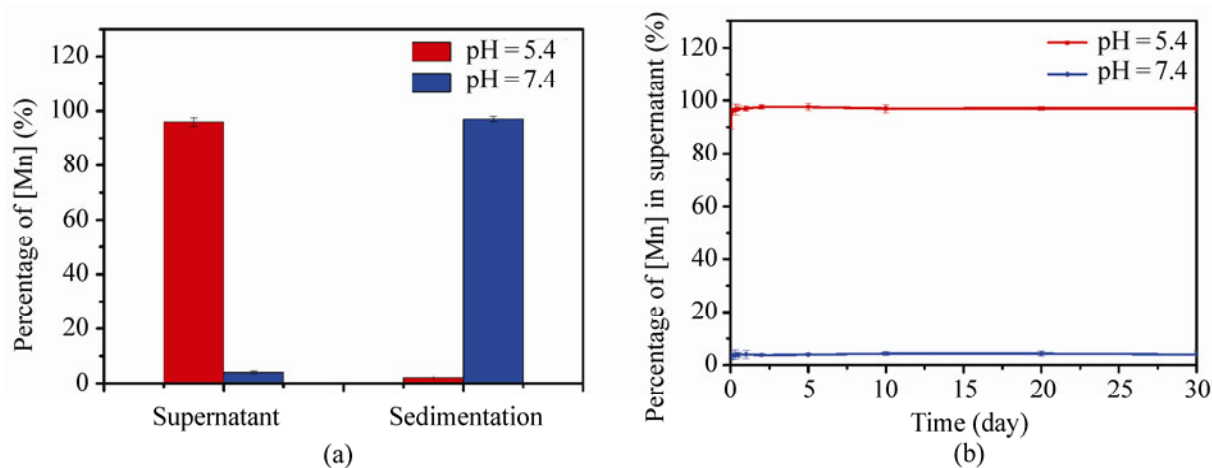

**Figure S-6** (a) Manganese content in supernatant and sedimentation of HMP after centrifugation with 15 000 r/min at pH 5.4 and pH 7.4. (b) Manganese concentration in the supernatant at pH 5.4 and 7.4 at 30 days after centrifugation

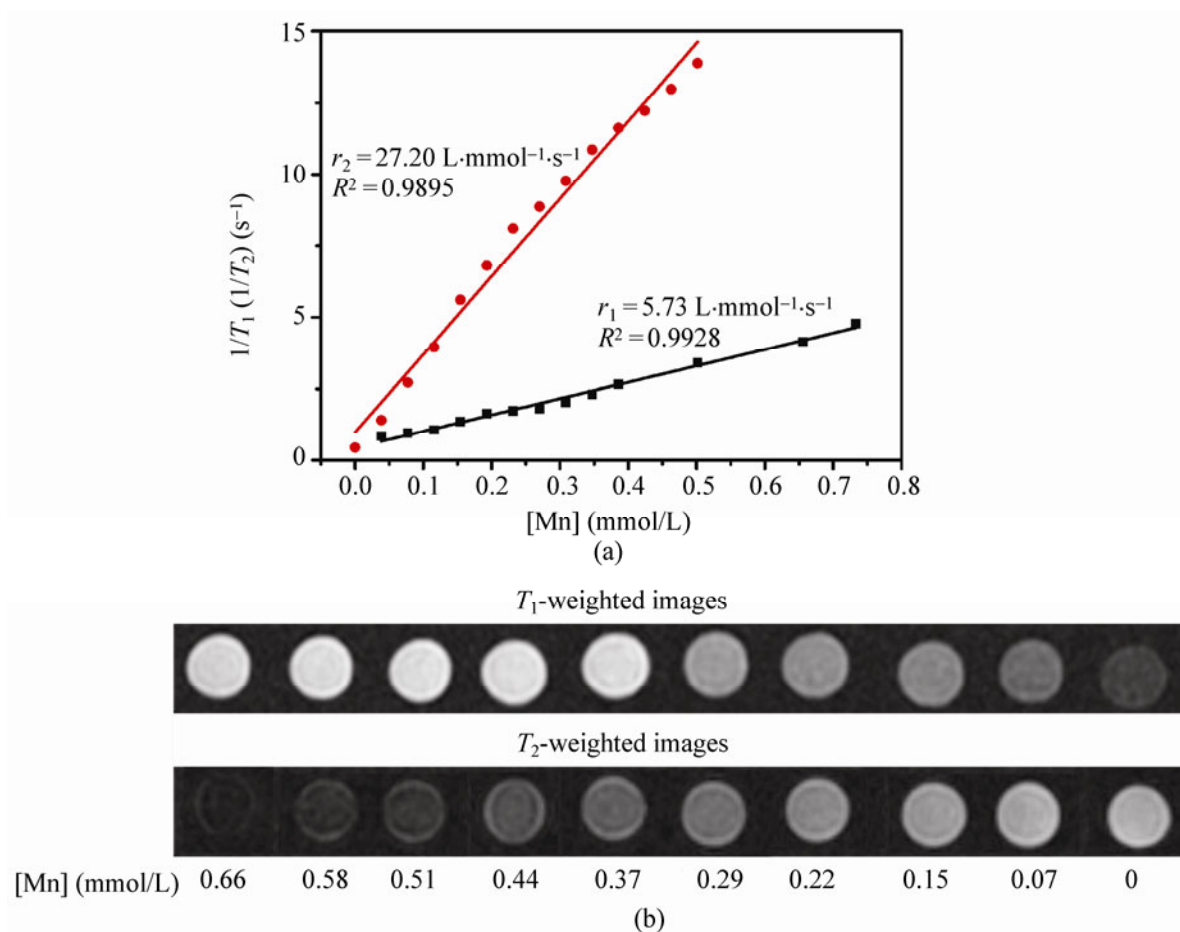

**Figure S-7** (a) Plots of  $T_1^{-1}$  and  $T_2^{-1}$  versus manganese concentration for  $\text{MnCl}_2$ . (b)  $T_1$ - and  $T_2$ -weighted images for  $\text{MnCl}_2$  in a 1.5 T MRI system

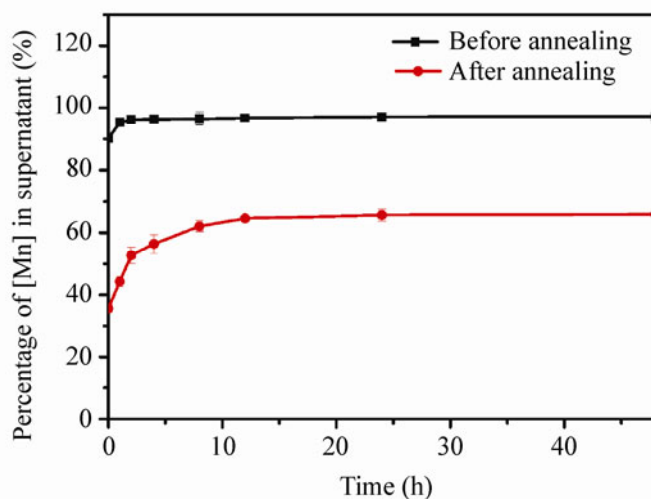

**Figure S-8** Manganese concentration in supernatant of HMP at pH 5.4 before and after annealing at 500 °C. The supernatant was obtained after centrifugation at 15 000 r/min for 30 min

## References

- [S-1] Larsen, E. K. U.; Nielsen, T.; Wittenborn, T.; Birkedal, H.; Vorup-Jensen, T.; Jakobsen, M. H.; Ostergaard, L.; Horsman, M. R.; Besenbacher, F.; Howard, K. A. et al. Size-dependent accumulation of PEGylated silane-coated magnetic iron oxide nanoparticles in murine tumors. *ACS Nano* **2009**, *3*, 1947–1951.
- [S-2] Morelli, C.; Maris, P.; Sisci, D.; Perrotta, E.; Brunelli, E.; Perrotta, I.; Panno, M. L.; Tagarelli, A.; Versace, C.; Casula, M. F. et al. PEG-templated mesoporous silica nanoparticles exclusively target cancer cells. *Nanoscale* **2011**, *3*, 3198–3207.
- [S-3] Vora, A.; Riga, A.; Dollimore, D.; Alexander, K. Thermal stability of folic acid in the solid-state. *J. Therm. Anal. Calorim.* **2004**, *75*, 709–717.
- [S-4] Shen, W.; He, H.; Zhu, J.; Yuan, P.; Frost, R. L. Grafting of montmorillonite with different functional silanes via two different reaction systems. *J. Colloid Interface Sci.* **2007**, *313*, 268–273.
- [S-5] He, H.; Duchet, J.; Galy, J.; Gerard, J. F. Grafting of swelling clay materials with 3-aminopropyltriethoxysilane. *J. Colloid Interface Sci.* **2005**, *288*, 171–176.
- [S-6] Abd El-Wahed, M. G.; Refat, M. S.; El-Megharbel, S. M. Synthesis, spectroscopic and thermal characterization of some transition metal complexes of folic acid. *Spectrochim. Acta, Part A* **2008**, *70*, 916–922.
